# Supplementary material for: Cyanobacterial Sfp-type phosphopantetheinyl transferases functionalize carrier proteins of diverse biosynthetic pathways
Source: PubMed Central journal article supplement (PMC5605751; doi:10.1038/s41598-017-12244-3), 2017-09-19
Supplement: 41598_2017_12244_MOESM1_ESM.pdf [file 41598_2017_12244_MOESM1_ESM.pdf]

## Supplementary information:

### Cyanobacterial Sfp-type phosphopantetheinyl transferases functionalize carrier proteins of diverse biosynthetic pathways

Guang Yang,<sup>†</sup> Yi Zhang,<sup>†</sup> Nicholas K. Lee,<sup>†</sup> Monica A. Cozad,<sup>†</sup> Sara E. Kearney,<sup>†,§</sup> Hendrik Luesch,<sup>†</sup> and Yousong Ding<sup>†,\*</sup>

<sup>†</sup>Department of Medicinal Chemistry and Center for Natural Products, Drug Discovery and Development, University of Florida, Gainesville, FL 32610, USA

<sup>§</sup>NIH Chemical Genomics Center, National Center for Advancing Translational Sciences, National Institutes of Health, Rockville, MD 20850, USA

#### Table of Contents

1. Methods.
2. Table S1: Oligos used in the present study.
3. Table S2: PPTases used in the phylogenetic analysis.
4. Table S3: Selected CPs for the characterization of PPTases.
5. Table S4: Relative activity of seven PPTases in activating 11 CPs.
6. Fig. S1: Schematic representation of post-translational phosphopantetheinylation of a CP domain by a PPTase.
7. Fig. S2: Multiple-sequence alignment of characterized cyanobacterial PPTases and Sfp.
8. Fig. S3: Sequences of selected *CP* genes and codon optimized *Sfp* gene.
9. Fig. S4: SDS-PAGE analysis of purified PPTases and CP proteins.
10. Fig. S5: HR-MS spectra of apo- and holo-CPs that were used and produced in the PPTase reactions.
11. Fig. S6: Michaelis-Menten kinetic analysis of APPT evaluated for 11 selected CP substrates.
12. Fig. S7: Schematic representation of homologous replacement of the *SPPT* gene with foreign *PPTase* genes in *Synechocystis* sp. PCC6803.
13. Fig. S8. PCR analyses of the integration and transcription of the *APPT*, *MPPT* and *Sfp* genes in *Synechocystis* mutants.

## Methods:

### Reagents and chemicals

Restriction enzymes, *Taq* DNA polymerase and Phusion DNA polymerase were purchased from Thermo Scientific. The protein ladders were purchased from Thermo Scientific or NEB. Chemicals and solvents were from Sigma Aldrich, Fisher Scientific or RPI Corp (USA). The GeneJET Plasmid Miniprep Kit, PCR Purification Kit and Gel Extraction Kit were from Thermo Scientific. Oligonucleotide primers were synthesized by Sigma Aldrich, while codon-optimized *Sfp* gene was obtained from GenScript. DNA sequencing was performed at Eurofins.

### Strains and culture conditions

*Escherichia coli* DH5 $\alpha$  and BL21-CodonPlus (DE3) RIPL were used for routine molecular biology studies and protein expression, respectively, and were grown in Luria-Bertani broth or Terrific broth. *Synechocystis* sp. PCC6803, *Anabaena* sp. PCC7120, *Anabaena variabilis* ATCC29413, *Fischerella* sp. PCC9339, *Microcystis aeruginosa* NIES-843, and *Synechococcus* sp. PCC7942 were purchased from UTEX or NIES (Japan) and cultured in BG11 medium with CO<sub>2</sub> bubbling. All cyanobacterial cultures were performed at 26 °C with 16h/8h light/dark cycle using 2000-2500 lux during lighting period. BG-11 medium supplemented with 1.0% (wt/vol) agar and 0.3% (wt/vol) sodium thiosulfate was used to grow cyanobacterial strains on the plate.

### Construction of plasmids

All oligonucleotide primers used in this work were listed in **Table S1**. The *PPTase* and *CP* genes were PCR amplified and cloned into pET28b (Novagen) to generate the expression plasmids. The inserts in the integration plasmids were sequentially constructed in the PCR reactions as shown in **Fig. S6**. The details were included in the supporting information. Briefly, a T7 terminator fragment was first introduced to the 3'-end of *APPT*, *MPPT* and *Sfp* genes by the PCR reactions. The resulted amplicons were fused to the 3'-end of P<sub>trc</sub> promoter-ribosomal binding site (P<sub>trc</sub>-RBS) in the overlapping PCR reaction. Next, a kanamycin resistance cassette amplified from pUC4K (Pharmacia) was fused to the 3'-end of the above amplicons to generate the final insert products. The final products were cloned into the integration vector pUC19int. To generate the pUC19int, the upstream and downstream regions (~1 kb) of the *SPPT* gene in *Synechocystis* were amplified and fused in the PCR reactions. The fusion product was then digested by *Hind*III and *Eco*RI and cloned into pUC19 to create pUC19int. All constructed plasmids were sequenced to eliminate potential errors in the inserts.

### Protein expression and purification

Recombinant proteins with an N-terminal His-tag were expressed in *E. coli* BL21-CodonPlus (DE3) RIPL. Cells were grown at 37 °C to an OD<sub>600</sub> = 0.5-0.6, and then cooled to 18 °C prior to the addition of 0.1-0.5 mM isopropyl- $\beta$ -D-galactopyranoside (IPTG). The cultures were grown at 18 °C for another 18-20 h before harvesting. *E. coli* cells were collected after centrifugation at 4 °C, 4,000 x g for 15 min, and frozen at -80 °C until the use. Pellets were thawed on ice, resuspended in a suitable volume of lysis buffer (50 mM Tris-HCl buffer, pH 8.0, 300 mM NaCl, 3 mM BME, 10 mM imidazole, 10% glycerol; wt/vol = 1:4), and subjected to sonication on ice with 2-s pulses. The soluble fractions were collected after centrifugation at 4 °C, 25,000 x g for 30 min, and incubated with Ni-NTA agarose resin (Thermo Fisher) at 4 °C for 1 h. The resin was then washed successively with ~10 column volumes of the lysis buffer containing 30 mM imidazole. Recombinant proteins were eluted with 50-300 mM imidazole in the lysis buffer. Proteins were analyzed with 15% SDS-PAGEs that were stained with Coomassie blue for imaging. After SDS-PAGE analysis, elution fractions containing the targeted proteins were combined. The purified

proteins were then exchanged into a storage buffer (50 mM Tris-HCl buffer, pH 8, 100 mM NaCl, 10% glycerol) using PD-10 column according to the manufacture's protocol (GE), aliquoted and stored at -80 °C until the use. The concentrations of recombinant proteins were determined by Nanodrop and/or Bradford assay.

#### **HPLC and LC-MS analysis**

A Shimadzu Prominence UHPLC system (Kyoto, Japan) fitted with a Vydac 218TP54-C18 (5  $\mu$ m, 4.6 mm x 250 mm) column was used for HPLC analysis. Solvent A was H<sub>2</sub>O with 0.1% TFA and solvent B was CH<sub>3</sub>CN with 0.1% TFA. The column was equilibrated with 10% solvent B for 2 min and then protein sample was eluted with a linear gradient of 10-70% in 30 min, followed by another linear gradient of 70-98% solvent B in 1 min. The column was further cleaned with 98% solvent B for 5 min and then re-equilibrated with 10% solvent B for 2 min. The flow rate was set as 0.8 mL/min, and the product was detected at 220 nm with a PDA detector. Apo- and holo-proteins were further analyzed in LC-MS analysis. MS spectra were acquired by using an API Qstar Pulsar i hybrid tandem mass spectrometer (Applied Biosystems). An Agilent Eclipse Plus C18, (3.5  $\mu$ m, 2.1 x 100 mm) was used. In LC-MS analysis, solvent A was H<sub>2</sub>O with 0.1% FA and solvent B was CH<sub>3</sub>CN with 0.1% FA. The protein samples were eluted with a linear gradient of 10-90% in 15 min at a flow rate of 0.3 mL/min. HRMS data were obtained using a Thermo Fisher Q Exactive Focus mass spectrometer equipped with electrospray probe on Universal Ion Max API source. The LC conditions were the same as those for the LC-MS analysis.

**Table S1.** Oligos used in the present study.

| <b>Primers</b> | <b>Sequence 5'-3'</b>                                                                   | <b>Function</b>    |
|----------------|-----------------------------------------------------------------------------------------|--------------------|
| Sfp-Fw         | CATGCCATGGAAATTTATGGGATTTAC                                                             | Sfp expression     |
| Sfp-Rv         | CCGCTCGAGCTACAACAGTTCTTCATAG                                                            | Sfp expression     |
| MPPT-Fw        | CATGCCATGGTTATATCTACCGATGA                                                              | MPPT expression    |
| MPPT-Rv        | CCGCTCGAGTAGATCAGAAAGGCCA                                                               | MPPT expression    |
| SPPT-Fw        | CATGCCATGGTCCCCAGCCCCAAAT                                                               | SPPT expression    |
| SPPT-Rv        | CCGCTCGAGGGGCAATGAATCAAGG                                                               | SPPT expression    |
| SePPT-Fw       | CATGCCATGGAACGCCCCAACCCCTAG                                                             | SePPT expression   |
| SePPT-Rv       | CCGCTCGAGATGATTTTTCCGGATTATG                                                            | SePPT expression   |
| APPT-Fw        | CATGCCATGGTGCAGCATACTTGGC                                                               | APPT expression    |
| APPT-Rv        | CCGCTCGAGATAATGCCAGAATTTTTG                                                             | APPT expression    |
| AvPPT-Fw       | CATGCCATGGTGCAGCATACTTGGCTAC                                                            | AvPPT expression   |
| AvPPT-Rv       | CCGCTCGAGATACTGCCAGAATTTTTGGC                                                           | AvPPT expression   |
| FPPT-Fw        | CATGCCATGGGGTCTGAGACTAATCA                                                              | FPPT expression    |
| FPPT-Rv        | CCGCTCGAGATACTGCCAGTACTTTAA                                                             | FPPT expression    |
| SFACP-Fw       | CATGCCATGGATCAGGAAATTTTTGA                                                              | SFACP expression   |
| SFACP-Rv       | CCGCTCGAGTTTACTTTTCGATATGCTC                                                            | SFACP expression   |
| AFACP-Fw       | GGAATTCCATATGAGCCAATCAG                                                                 | AFACP expression   |
| AFACP-Rv       | CCGCTCGAGAGCTGATGCGGCAACTTG                                                             | AFACP expression   |
| APACP-Fw       | CATGCCATGGGTCTAAAACAAAATTATAG                                                           | APACP expression   |
| APACP-Rv       | CCGCTCGAGAGATTGTTCTTCCAATTCTTC                                                          | SFACP expression   |
| APNPCP-Fw      | CATGCCATGGAACAATCTACAATAATC                                                             | APNPCP expression  |
| APNPCP-Rv      | CCGCTCGAGATCAGTAATAGGCGATTG                                                             | APNPCP expression  |
| FNPCP-Fw       | CATGCCATGGCCCAACGCCCTATCATTATC                                                          | FNPCP expression   |
| FNPCP-Rv       | CCGCTCGAGTTCAACTTCATCACTATC                                                             | FNPCP expression   |
| FisPCP-Fw      | CATGCCATGGGATCGCTTCCCAAACCTG                                                            | FisPCP expression  |
| FisPCP-Rv      | CCGCTCGAGTGAATTGGGAAAAACATC                                                             | FisPCP expression  |
| FNsACP-Fw      | CATGCCATGGCTTTTCTAGAAGATGTC                                                             | FNsACP expression  |
| FNsACP-Rv      | CCGCTCGAGGGAATTACCTAGAAAAGC                                                             | FNsACP expression  |
| AprACP-Fw      | CATGCCATGGAAATTTTTGAACAGGAAT                                                            | AprACP expression  |
| AprACP-Rv      | CCGCTCGAGACTAAAATTAATATCTTC                                                             | AprACP expression  |
| MACP-Fw        | CATGCCATGGTGACAACCTGTTCAATC                                                             | MACP expression    |
| MACP-Rv        | CCGCTCGAGAAGATATAATTTCCCT                                                               | MACP expression    |
| ScACP-Fw       | CATGCCATGGAGCAGCGGCTGGCTC                                                               | ScACP expression   |
| ScACP-Rv       | CCGCTCGAGCTCCTGCTCGCCGAAC                                                               | ScACP expression   |
| SSPCP-Fw       | CATGCCATGGAGGAGATCCTCGCC                                                                | SSPCP expression   |
| SSPCP-Rv       | CCGCTCGAGGGTACGCCCGGCCAGGC                                                              | SSPCP expression   |
| SPPT-Up-F      | CCAAGCTT CCTGGCAGTAGTGTGGTG                                                             | Integration vector |
| SPPT-Up-R      | GGTAACGAAAACCTAGTCGTACGAGGTCAGTTTAAACAGCG                                               | Integration vector |
| SPPT-Dn-F      | AAACTGACCTCGTACG ACTAGTTTTTCGTTACCTTGGGCCG                                              | Integration vector |
| SPPT-Dn-R      | GTGAATTC GGGCTACACCGTCGCTAC                                                             | Integration vector |
| Syn-APPT-F     | TAAAGAGGTATATATTAATGTTGCAGCATACTTGG                                                     | Integration vector |
| Syn-APPT-R     | CATAGCTGTTTCTGTGTCAAAAACCCCTCAAGACCCGTTTAGA<br>GGCCCCAAGGGGTTATGCTAGTCAATAATGCCAGAATTTG | Colony PCR         |
| Syn-MPPT-F     | TAAAGAGGTATATATTAATGTTTATATCTACCGATG                                                    | Colony PCR         |
| Syn-MPPT-R     | CATAGCTGTTTCTGTGTCAAAAACCCCTCAAGACCCGTTTAGA<br>GGCCCCAAGGGGTTATGCTAGTCATAGATCAGAAAGGCC  | Colony PCR         |
| Syn-SFP-F      | TAAAGAGGTATATATTAATGAAAATTTATGGGATTTAC                                                  | Colony PCR         |
| Syn-SFP-R      | CATAGCTGTTTCTGTGTCAAAAACCCCTCAAGACCCGTTTAGA<br>GGCCCCAAGGGGTTATGCTAGTACAACAGTTCTTCATAG  | Colony PCR         |
| Ptc-F          | CTCGTACGATTCTGAAATGAGCTGTTG                                                             | Colony PCR         |

**Table S1.** Continued

| <b>Primer</b>            | <b>Sequence 5'-3'</b>                  | <b>Function</b> |
|--------------------------|----------------------------------------|-----------------|
| P <sub>trc</sub> -APPT-R | CCAAGTATGCTGCAACATTAATATATACCTCTTTA    | Colony PCR      |
| P <sub>trc</sub> -MPPT-R | CATCGGTAGATATAAACATTAATATATACCTCTTTA   | Colony PCR      |
| P <sub>trc</sub> -SFP-R  | GTAAATCCCATAAATTTTCATTAATATATACCTCTTTA | Colony PCR      |
| Kana-F                   | GTCTTGAGGGGTTTTTTG ACACAGGAAACAGCTATG  | Colony PCR      |
| Kana-R                   | AAACTAGTAAACGACGGCCAGTGAAT             | Colony PCR      |
| RT-rnpB-F                | CGTGAGGACAGTGCCACAG                    | RT-PCR          |
| RT-rnpB-R                | CGCTCTTACCGCACCTTTG                    | RT-PCR          |
| RT-SPPT-F                | TTTGATTGGCTTAAGTAC                     | RT-PCR          |
| RT-SPPT-R                | AATGCTTCCTTCGCTGTC                     | RT-PCR          |
| RT-APPT-F                | ATCTAGTGACGAATTAGC                     | RT-PCR          |
| RT-APPT-R                | AATAAACCACTCTCGGC                      | RT-PCR          |
| RT-MPPT-F                | GTATTA ACTATCAATTGC                    | RT-PCR          |
| RT-MPPT-R                | AAGCTATCTAAATCTTTC                     | RT-PCR          |
| RT-Sfp-F                 | TAGTCATTCTGGTCGCTG                     | RT-PCR          |
| RT-Sfp-R                 | ATAAATCAGAGTATTCGG                     | RT-PCR          |

**Table S2.** PPTases used in the phylogenetic analysis.

| Accession Number | Gene name/locus tag       | Organisms                                       | Length (aa) |
|------------------|---------------------------|-------------------------------------------------|-------------|
| ABA22212.1       | PPTase <sup>a</sup>       | <i>Anabaena variabilis</i> ATCC 29413           | 237         |
| WP_044522635.1   | PPTase                    | <i>Nostoc</i> sp. PCC 7120                      | 237         |
| WP_004163140.1   | PPTase                    | <i>Microcystis aeruginosa</i> NIES-843          | 220         |
| ABB57835.1       | HetI protein-like         | <i>Synechococcus elongatus</i> PCC 7942         | 259         |
| WP_012307697.1   | PPTase                    | <i>Synechococcus</i> sp. PCC 7002               | 227         |
| WP_010873553.1   | PPTase                    | <i>Synechocystis</i> sp. PCC 6803               | 246         |
| WP_017309026.1   | PPTase                    | <i>Fischerella</i> sp. PCC 9339                 | 240         |
| ACG68433.1       | Sfp                       | <i>Bacillus subtilis</i>                        | 224         |
| WP_009782852.1   | PPTase                    | <i>Lyngbya</i> sp. PCC 8106                     | 239         |
| WP_026092908.1   | PPTase                    | <i>Calothrix</i> sp. PCC 7103                   | 241         |
| WP_016950943.1   | PPTase                    | <i>Anabaena</i> sp. PCC 7108                    | 240         |
| AAW67221.1       | PPTase                    | <i>Nodularia spumigena</i> NSOR10               | 239         |
| WP_015186867.1   | PPTase                    | <i>Gloeocapsa</i> sp. PCC 7428                  | 253         |
| EHJ11403.1       | PPTase                    | <i>Crocospaera watsonii</i> WH 0003             | 248         |
| WP_006529694.1   | PPTase                    | <i>Gloeocapsa</i> sp. PCC 73106                 | 242         |
| WP_051044566.1   | hypothetical protein      | <i>Pleurocapsa</i> sp. PCC 7319                 | 243         |
| WP_006511535.1   | PPTase                    | <i>Xenococcus</i> sp. PCC 7305                  | 255         |
| BAU66329.1       | PPTase                    | <i>Stanieria</i> sp. NIES-3757                  | 250         |
| WP_017660318.1   | hypothetical protein      | <i>Geitlerinema</i> sp. PCC 7105                | 226         |
| CUR17315.1       | PPTase                    | <i>Planktothrix</i> sp. PCC 11201               | 249         |
| WP_015112227.1   | PPTase                    | <i>Nostoc</i> sp. PCC 7107                      | 243         |
| SCY12562.1       | PPTase                    | <i>Nitrosospira</i> sp. Nsp13                   | 246         |
| WP_017306450.1   | PPTase                    | <i>Spirulina subsalsa</i>                       | 235         |
| WP_029633554.1   | hypothetical protein      | <i>Scytonema hofmanni</i> UTEX B 1581           | 235         |
| OCQ99688.1       | PPTase                    | <i>Oscillatoriales cyanobacterium</i> USR001    | 254         |
| WP_057178475.1   | PPTase                    | <i>Cylindrospermopsis</i> sp. CR12              | 240         |
| WP_041933312.1   | PPTase                    | <i>Cyanothece</i> sp. PCC 7822                  | 240         |
| WP_054469188.1   | hypothetical protein      | <i>Planktothricoides</i> sp. SR001              | 247         |
| WP_059000742.1   | hypothetical protein      | <i>Leptolyngbya</i> sp. NIES-2104               | 235         |
| WP_015127290.1   | PPTase                    | <i>Calothrix</i> sp. PCC 7507                   | 234         |
| ZP_00107102.1    | PPTase                    | <i>Nostoc punctiforme</i> PCC 73102             | 239         |
| ACN96032.1       | holo-acyl-carrier-protein | <i>Fischerella</i> sp. MV11                     | 128         |
| WP_015181769.1   | PPTase                    | <i>Microcoleus</i> sp. PCC 7113                 | 139         |
| AFY89096.1       | PPTase                    | <i>Chroococciopsis thermalis</i> PCC 7203       | 137         |
| WP_006519439.1   | holo-ACP synthase         | <i>Leptolyngbya</i> sp. PCC 7375                | 129         |
| NP_926954.1      | ACP synthase              | <i>Gloeobacter violaceus</i> PCC 7421           | 132         |
| AFY65439.1       | holo-acyl-carrier-protein | <i>Geitlerinema</i> sp. PCC 7407                | 148         |
| WP_006634204.1   | holo-ACP synthase         | <i>Microcoleus vaginatus</i>                    | 157         |
| WP_015187908.1   | holo-ACP synthase         | <i>Gloeocapsa</i> sp. PCC 7428                  | 129         |
| BAL39319.1       | holo-acyl-carrier-protein | <i>Escherichia coli</i> str. K-12 substr. MDS42 | 126         |
| AAH75207.1       | MGC84206 protein          | <i>Xenopus laevis</i>                           | 302         |
| XP_040785.1      | PPTase                    | <i>Homo sapiens</i>                             | 309         |
| AGP54231.1       | PPTase                    | <i>Streptomyces rapamycinicus</i> NRRL 5491     | 247         |

<sup>a</sup>. PPTase is an abbreviation of 4'-phosphopantetheinyl transferase.

**Table S3.** Selected CPs for the characterization of PPTases.

| CPs    | Strains                               | Metabolites          | Biosynthetic pathway | Apo-form MW | Holo-form MW            |                       | GenBank accession number |
|--------|---------------------------------------|----------------------|----------------------|-------------|-------------------------|-----------------------|--------------------------|
|        |                                       |                      |                      |             | Calculated <sup>d</sup> | Observed              |                          |
| SFACP  | <i>Synechocystis</i> sp. PCC6083      | Fatty acid           | FAS                  | 9655.69     | 9995.69                 | 9997.78               | ssl2084                  |
| AFACP  | <i>Anabaena</i> sp. PCC7120           | Fatty acid           | FAS                  | 10282.20    | 10622.20                | 10622.65              | WP_010997493.1           |
| APACP  | <i>Anabaena</i> sp. PCC7120           | Glycolipid           | PKS                  | 10804.09    | 11144.09                | 11012.84 <sup>a</sup> | WP_010999481.1           |
| APNPCP | <i>Anabaena</i> sp. PCC7120           | Unknown              | NRPS/PKS             | 12115.69    | 12455.69                | 12455.54              | WP_010996791.1           |
| FNPCP  | <i>Fischerella</i> sp. PCC9339        | Unknown              | NRPS                 | 10699.21    | 11039.21                | 10908.39 <sup>a</sup> | WP_017308667.1           |
| FisPCP | <i>Fischerella</i> sp. PCC9339        | Shinorine            | NRPS                 | 12475.06    | 12815.06                | 12683.13 <sup>a</sup> | WP_017312907.1           |
| FNsACP | <i>Fischerella</i> sp. PCC9339        | Unknown <sup>b</sup> | NRPS/PKS             | 15215.20    | 15555.20                | 15422.01 <sup>a</sup> | WP_017308557.1           |
| AprACP | <i>Moorea bouillonii</i>              | Apratoxin            | NRPS/PKS             | 10693.38    | 11033.38                | 11035.41              | ctg1_8 <sup>c</sup>      |
| MACP   | <i>Microcystis aeruginosa</i> NIES843 | Unknown              | NRPS/PKS             | 11106.54    | 11446.54                | 11314.81 <sup>a</sup> | WP_012265828.1           |
| ScACP  | <i>Streptomyces coelicolor</i> A(3)2  | Concanamycin         | PKS                  | 11186.50    | 11526.50                | 11526.67              | WP_011030786.1           |
| SsPCP  | <i>Streptomyces scabiei</i> 87.22     | Thaxtomin            | PKS                  | 8240.44     | 8580.44                 | 8580.49               | CBG75339.1               |

<sup>a</sup>Values corresponded to the proteins without the *N*-terminal methionine residue; <sup>b</sup>FNsACP is a homolog of NdaC from *Nodularia spumigena* NSOR10; <sup>c</sup>gene sequence is provided in the supporting information; <sup>d</sup>The MW of a holo-form CP was calculated by adding the mass of a phosphopantetheinyl moiety (340 Da) to that of its apo-form.

**Table S4.** Relative activity of seven PPTases in activating 11 CPs<sup>a</sup>.

| PPTase | CPs        |            |            |            |            |            |            |            |            |            |            |
|--------|------------|------------|------------|------------|------------|------------|------------|------------|------------|------------|------------|
|        | SFACP      | AFACP      | APNPCP     | FNPCP      | FisPCP     | AprACP     | APACP      | MACP       | FNsACP     | ScACP      | SsPCP      |
| APPT   | 99.1 ± 1.1 | 100 ± 2.0  | 100 ± 1.4  | 75.4 ± 2.9 | 100 ± 1.5  | 100 ± 1.4  | 100 ± 1.6  | 89.7 ± 3.9 | 100 ± 1.4  | 64.9 ± 3.1 | 28.8 ± 3.8 |
| AvPPT  | 98.3 ± 2.4 | 98.7 ± 0.6 | 98.6 ± 2.6 | 81.9 ± 1.4 | 93.7 ± 3.2 | 93.7 ± 1.2 | 22 ± 2.3   | 88.5 ± 2.5 | 94.5 ± 0.6 | 28.6 ± 2.1 | 32.8 ± 2.7 |
| MPPT   | 94.8 ± 1.3 | 99.6 ± 1.7 | 93.9 ± 1.3 | 96.2 ± 0.6 | 97.4 ± 3.6 | 93.2 ± 1.9 | 84.6 ± 3.8 | 100 ± 2.1  | 93.5 ± 1.3 | 18.8 ± 0.6 | 24 ± 3.9   |
| FPPT   | 96.1 ± 2.1 | 94.5 ± 0.8 | 0.0        | 100 ± 0.7  | 78.5 ± 3.1 | 89.9 ± 2.1 | 10.1 ± 1.0 | 0.0        | 91.0 ± 2.4 | 0.0        | 29 ± 3.2   |
| SePPT  | 99.5 ± 0.8 | 94.9 ± 2.2 | 0.0        | 30.5 ± 2.7 | 47.3 ± 2.8 | 11.9 ± 1.1 | 11.9 ± 0.8 | 0.0        | 43.6 ± 3.3 | 0.0        | 0.0        |
| SPPT   | 100 ± 1.6  | 98.8 ± 3.1 | 71.6 ± 2.3 | 96.1 ± 1.5 | 87.8 ± 1.3 | 79.3 ± 2.7 | 79.3 ± 4.1 | 16.1 ± 1.7 | 79.2 ± 3.2 | 0.0        | 8.3 ± 0.8  |
| Sfp    | 98.6 ± 1.7 | 96.2 ± 1.3 | 53.3 ± 3.8 | 82.8 ± 1.9 | 25.1 ± 1.5 | 99.6 ± 2.2 | 98 ± 3.3   | 97.1 ± 2.9 | 92.9 ± 2.0 | 100 ± 1.7  | 100 ± 1.0  |

<sup>a</sup>The data represented mean ± SD of three independent experiments.



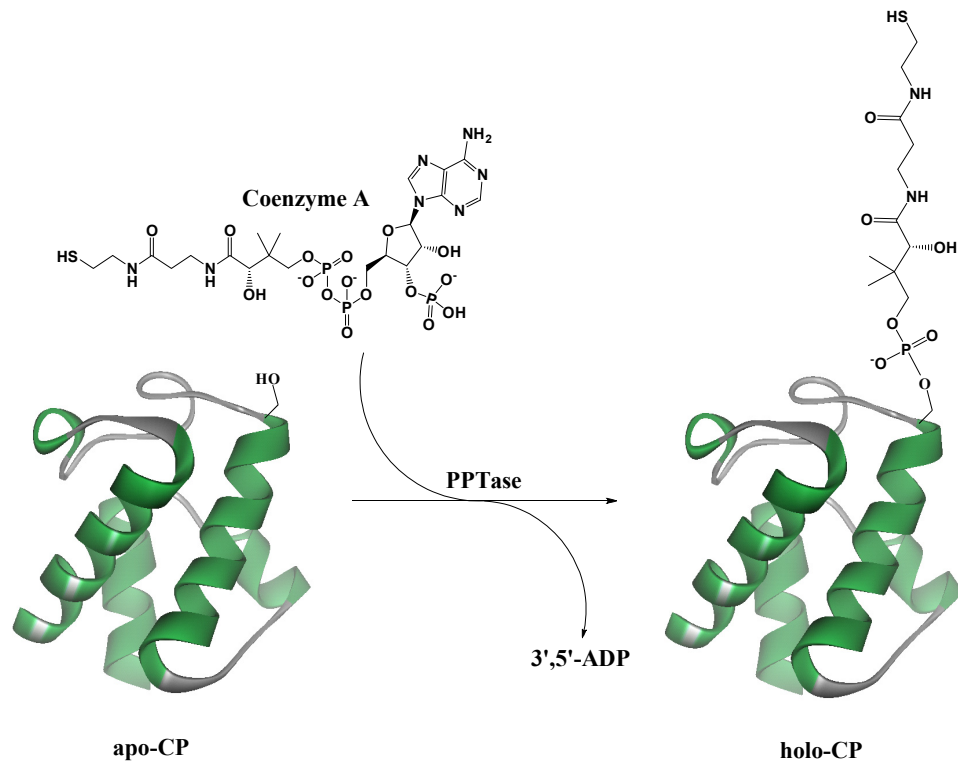

**Fig. S1.** Schematic representation of post-translational phosphopantetheinylation of a CP domain by a PPTase. The modification leads to a mass increase of 340 Dalton.

|       |                                                               |     |
|-------|---------------------------------------------------------------|-----|
| Sfp   | -----MKIYGIYMDRPLSQEENE                                       | 18  |
| SePPT | MQRPNPSDAVPVPSIPSCDRGPIPNPVTWRTSPEPLFLSAQTVHLWRCSLTRSLSSAE--  | 58  |
| SPPT  | -----MLPQPQIWLCPDRPL--IP--                                    | 18  |
| MPPT  | -----MFISTDEVHLYFISLDPSGDRLE--                                | 23  |
| FPPT  | -----MGSETNHLWLTAPTNTLLPDDVHVWRISLDRPESELQ--                  | 38  |
| AvPPT | -----MLQHTWLPKPPNLTLLSDEVHLWRIPLDRPESQLQ--                    | 35  |
| APPT  | -----MLQHTWLPKPPNLTLLSDEVHLWRIPLDQPESQLQ--                    | 35  |
|       |                                                               |     |
| Sfp   | RFMTFISPEKREKRRFYHKEDAHRITLLGDVLRVSVISRQYQLDKSDIRFSTQEYGKPCI  | 78  |
| SePPT | QAI---VAADCRAQA-YGSNRRHQFLCGRWWRQLLSLYLPEEPADFRFQLSPTGKPEL    | 114 |
| SPPT  | GYQALLSSEEMARGERYPQDKQRFLTMRLALRILLARQLDCLPQQLQFTYGPQKPEL     | 78  |
| MPPT  | TLASLLSEDEIIRANRYHFPEHKRRFLVARGCLREILGSYLAISPEKIEFIYSEKPKPSI  | 83  |
| FPPT  | ALQTTLSDEIARAQRFYFEQHRQRFVAGRGILRTILGRYLGVEPQAVEFTYELRGKPLL   | 98  |
| AvPPT | HLAATLSSDELARANRFYFPEHRQRFVAGRGILRSILGLYLGVEPKQVKFEYESRGKPVL  | 95  |
| APPT  | DLAATLSSDELARANRFYFPEHRRRFTAGRGILRSILGGYLGVEPKQVKFDYESRGKPII  | 95  |
|       |                                                               |     |
| * *   |                                                               |     |
| Sfp   | PDL---PDAHFNISHSGRWVIGAFD-SQPIGIDIEKTKPI--SLEIAKRFFSKTEYSDLL  | 132 |
| SePPT | PQ----SNLCFNLSHSGSTLLIAIAW-QPVGVQVQPRSR-SWLALARRYFPSAELAAMQ   | 168 |
| SPPT  | VDRERR-SPWFNVVAHSGNYGLIGLSTEGEIGVDLQIMLPKPHYLKAKRFFAPQEVQOLE  | 137 |
| MPPT  | NY-----QLQFNLSHSEEMAICGLTLTARIGVDLEKMRQMKDLDLSLTKRFFCAREHELVE | 138 |
| FPPT  | ADRFADSGVSNLSHSDLALCGVSRNRKIGIDVEYMRVSDVEALAERFFAPREYEVVR     | 158 |
| AvPPT | GDRFADSGLLFNLSHSQNLGLCAVNYTRQIGIDLEYLRPTSDLESIAKRFFLPREYELLR  | 155 |
| APPT  | GDRFAESGLLFNLSHSQNLALCAVNYTRQIGIDLEYLRPTSDLESIAKRFFLPREYELLR  | 155 |
|       |                                                               |     |
| *     |                                                               |     |
| Sfp   | AKDKDEQTDYFYHIWSMKESFKKQEGKGLSLPLDSFSVRLHQDGQVSIELPDSHSPCYIK  | 192 |
| SePPT | Q--STDCDRWGLASWVCKEAWIKAQGRITLANSIRHLQCAWTANGQPRLSGLGSEES-QVQ | 225 |
| SPPT  | SLEGEKRTKLFYQIWTAKEAFLKATGKGISGGLNQVIPDENLAKYQYLPDS----G-DTN  | 192 |
| MPPT  | K--SAEKEKLFQIWTAKEAYLKAVGTGISGGLDRVEVGLNPLKLD--NVA----G-EWQ   | 189 |
| FPPT  | SLPSNQQQVFFRYWTCKEAYLKAIGVGIVQ-LEKVEISLTLEQPAKLITD----E-EWS   | 212 |
| AvPPT | SLPDEQKQKIFFRYWTCKEAYLKATGDGIK-LEEIEIALTPTEPAKLQTT----P-AWS   | 209 |
| APPT  | SLPDEQKQKIFFRYWTCKEAYLKATGDGIK-LEEIEIALTPTEPAKLQTA----P-AWS   | 209 |
|       |                                                               |     |
| Sfp   | TYEVDPGYK--MAVCAAHPDFPEDIT---MVSYEELL-----                    | 224 |
| SePPT | LLQVDPQEQWLWAAI-AMPAGWNYQTWTAAIIRKNH-----                     | 259 |
| SPPT  | HWRLSSQ-----PLLADQGSNDNYWMAIAWCTNEVNQVESNYLPNIQPFQWPRNLDLSP   | 246 |
| MPPT  | LWTAAIGDNRYRATVVIEGSDRVIKTF-----GLSDL-----                    | 220 |
| FPPT  | LIELVPGDHLYLGAVAIAQNLDLKYW-----QY-----                        | 240 |
| AvPPT | LLELVPDDNCVAAVAVAGFGWQPKFW-----QY-----                        | 237 |
| APPT  | LLELVPDDNCVAAVAVAGFGWQPKFW-----HY-----                        | 237 |

**Fig. S2.** Multiple-sequence alignment of characterized cyanobacterial PPTases and Sfp. The completely conserved residues are shaded in gray. The proposed magnesium binding residues are indicated with asterisks (\*). Boxed region indicates the conserved W/KEA motif.

***SFACP***

ATCAGGAAATTTTTGAAAAAGTAAAAAAATCGTCGTGGAACAGTTGGAAGTGGATCCTGACAAAGTGA  
CCCCGATGCCACCTTTGCCGAAGATTTAGGGGCTGATTCCCTCGATACAGTGGAAATTGGTCATGGCCCT  
GGAAGAAGAGTTTGATATTGAAATTCCCAGATGAAGTGGCGGAAACCATTGATACCGTGGGCAAAGCCGT  
TGAGCATATCGAAAGTAAA

***AFACP***

GCCAATCAGAACTTTTAAAAAGTCAAAAAAATTGTTATCGAACAACTAAGTGTGGAGAACCCTGACA  
CAGTAACTCCAGAAGCTAGTTTTGCCAACGATTTACAGGCTGATTCCCTCGATACAGTAGAACTAGTAAT  
GGCTTTGGAAGAAGAAATTTGATATCGAAATTTCCCGATGAAGCCGCAGAGAAAATTACCACTGTTCAAGA  
AGCGGTGGATTACATCAATAACCAAGTTGCCGCATCAGCT

***APACP***

GTCTAAAACAAAATTATAGTGCAGCAGATATTCAAGCTTGGATGATATCTAATCTAGCTGAATTGTTGGG  
AGTAGATGGTGATGAAATCGATGCTACTGTCAATTTAGAAAGCTATGTTTTGGATTCGGCACAGGCAAT  
GGTACTAGTTAGTAACTAGAGCAATTGTTGGGATTTCAACCATCACCTTTGTTGTTGTGGCATTACCCC  
ACTATTGAATCGTTGTCTGAACGTTTAGCTGAAGAATTGGAAGAACAATCT

***APNPCP***

AACAATCTACAATAATCACGCCCGCCCCCAAATTACCGCTACCTACCTTCCCCCAGCAATGAAATTGA  
AGCCAGAGTCACCCAAGTAATGGAGAGTTTATTGGGAATCGCTCCTATTGGGGTTAATGATAACTTCTTT  
GAGTTAGGAGGACATTCCCTGTTAGCAATTTCAAGCAGTTTCACAGCTACGGGAAGAATTTCAAGTAGAA  
TTACCCATGCGACAATTTTTATTTGAGTCACCCACAATTGGGGGGATAGCCAAAATTATCATTGAAAATC  
AATCGCCTATTACTGAT

***FNPCP***

CCCAACGCCCTATCATTATCCCTCGTACAAATACTGAACAGCGAATAGGCGAGATTTGGAAGAAGGCCGA  
TGAAGTGGGATTCTGTCTCGATATGTGATGATTTCTTTGAATCTGGCGGAAATTCATTATTGCTGTGAG  
AATAATCAACGCTATCAACAAAGAATTTCAATTGTGCCTTGCCTTTACATGCTCTTTTTGAAGCTCCAAGC  
ATTGAAAAGCTCGCTCATAAGGTTGATAGTGATGAAGTTGAA

***FNsACP***

GCTTTTCTAGAAGATGTCCCTCCAACAGAACGTCGAGAACAATTATTAGAATATCTTGGAAAAGAAGTA  
GCAAAAATCTTAGGAATAAAACATATACCCGACCCAGAACAAGGATTTATAGAAATGGGAATTGACTCT  
TTGCTTTCCATTGAATTCAAAAATCGTTTAGAAAAAGGATTAGAAATTGCTTTACCATCTACTTTAATATT  
TGATTTTCCGAATATTAGCAAATTAATAATTATCTATTTGAGCAAATTTATGGTTGGGAAGTAAATACT  
ACCGTGGAGACAACTGTTGATATTGTAGAAGTTAATGAAGATTTAATTTTGCAAGAACTGGCAGATTTA  
GAAGCTTTTCTAGGTAATTCCTCGAGCACCACCACCACCCTGA

***FisPCP***

AGGCGATCGCTTCCCAAACCTGATTTTTCTAACTTAATCACTCATGAAGATTTTACGCCTGCACGCAATG  
ATTTAGAGAGAAAAATCGCGCAGATTTGGTCAGAAATTTACAGATTTCCGAAATTGATATTAGAGATA  
ACTTTTTGAAGTTGGTGGTAATTCCTTTTAGCATTACATTTAATGAATGCCATCGAACAAAAATTTGGT  
CGAGAGTTAGCACTGTCAACTTTACTTACTAATAACTCAATTGAAAACTAGCAGAAATTCTGCAAAAC  
CCCACAGATGTTTTTCCCAATTCA

***AprACP***

AAATTTTTGAACAGGAATGTCGAAAATTATTAATAATCTCTACTGGGTGTTCAACGTATGGAGAGATTGCC  
TGGTGACACACCACTAATGGAGTCAGGAATGGATTCACTGGAGTTGTTAGAATTCGTGCTCTTATAGAA  
AGAAAGTTTGGGATTAAGTTAAAGTCTACCTTCTTTTTTAGTTACAAAACCTTTATAGCGGTAGCAGAGT  
ATCTTTCAGAACGGGAAGATATTAATTTTAGT

***MACP***

TGACAACTGTTCAATCTCCTTGTACCGTTGAAGACATTCAAAAACCTGGCTCGTTGATCAGTTTGCTCAACA  
ACTCGATGTTGACCTTGATGACATTGATATTGAAGAACCTTTTGATAATTATGAACTCGACTCACGAAAA  
GCGTTAGTTTTATTAGGACGCTTAGAAAAATGGCTCGGAAAGGAATTAATCCTGTGGTCATTTTAACT  
ATCCCACCATTGCTGAATTAGCAACCCGATTAGGGGAATTATATCTT

***ScACP***

GAGCAGCGGCTGGCTCCGCTGTCCGCGGCCGAGCGCGAGCGGGCACTCACGGATCTCGTGCGCGTCCAG  
GTCGCGGGCGGTGCTCGGGCACTCTGACCCCGGCGCGATCGAGTCCGGCCGGGCCTTCCAGGAGCTGGGC  
TTCGACTCACTGACAGCCGTCGAACTTCGCAACCAGCTGAGCACCGCGAGCGGACTGCGCCTGCCACC  
ACCCTCGTCTTCGACCACCCCTCCCCGCGCTCTCGCCGCCACCTCTCGGCGGAGCTGTTTCGGCGAGC  
AGGAG

***SsPCP***

GCCCGCCGGCTCGAACC GTTGGACGAACCCGCGCGACGCCGTCTGCTGCTCGACCTGGTGTGCGACCAC  
GCGGCCGCGGTCTCGGCCACACCGGCCGCCAGGCCGTCCCGGCCGACCAGGCGTTCTCCGCCGTCGGG  
TTCGACTCGATGCTCGCCGTGCTTCCGTAACCGGCTGCGCACCGCGACCAGGCGTCCCGTCCGCCGGA  
CGGTGGTGTTCGACCATCCACCCCGCCGCCCTCGCCGACCACCTGTACGACGGTTGAGCGCCCGTCC  
CGGACCGGCCGTT

**Codon optimized *Sfp***

ATGAAAATTTATGGGATTTACATGGATAGACCCCTGAGCCAAGAAGAAAACGAACGCTTTATGACCTTT  
ATTAGCCCTGAAAAACGGGAAAAATGTCGCCGTTTTTATCATAAAGAAGATGCCCATCGTACCTTATTGG  
GTGATGTGTTGGTTCGGAGTGTGATTTCTCGCCAATACCAATTGGATAAAAAGTGATATTCGGTTTTCTAC  
TCAAGAATATGGTAAACCCTGTATTCCCATTGCCCCGATGCCATTTAATATTAGTCATTCTGGTTCGCT  
GGGTTATTGGTGTCTTTGATAGTCAACCCATTGGTATTGATATTGAAAAAACCAAACCCATTTCTTTGGA  
AATTGCCAAACGCTTTTTTTCAGTAAAACCGAATACTCTGATTTATTGGCTAAAGATAAAGATGAACAACT  
GATTACTTTTACCATTTGTGGAGTATGAAAGAATCTTTTATTAACAAGAAGGTAAAGTTTAAAGTTTGC  
CCTTAGATAGTTTTTCTGTGCGGTTGCATCAAGATGGTCAAGTTAGTATTGAATTACCCGATAGTCATTCT  
CCCTGTTACATTAACCTTATGAAGTTGATCCCGGTTATAAAATGGCTGTTTGTGCAGCACACCCCGATT  
TTCCAGAAGATATTACTATGGTTTCCTATGAAGAACTGTTGTAG

**Fig. S3.** Nucleotide sequences of selected wild type CP genes and codon optimized *Sfp* gene.

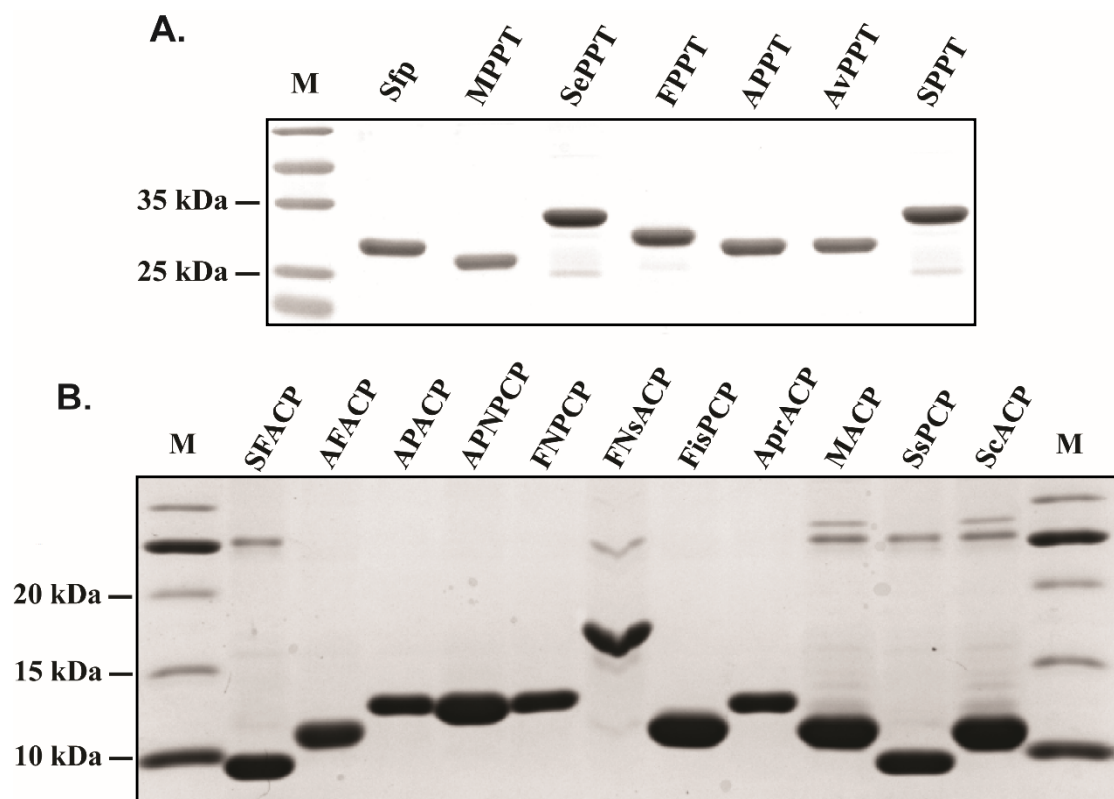

**Fig. S4.** SDS-PAGE (15%) analysis of the purified PPTase (A) and CP (B) proteins. All proteins showed expected molecular weights and CPs were validated in LC-MS analysis.

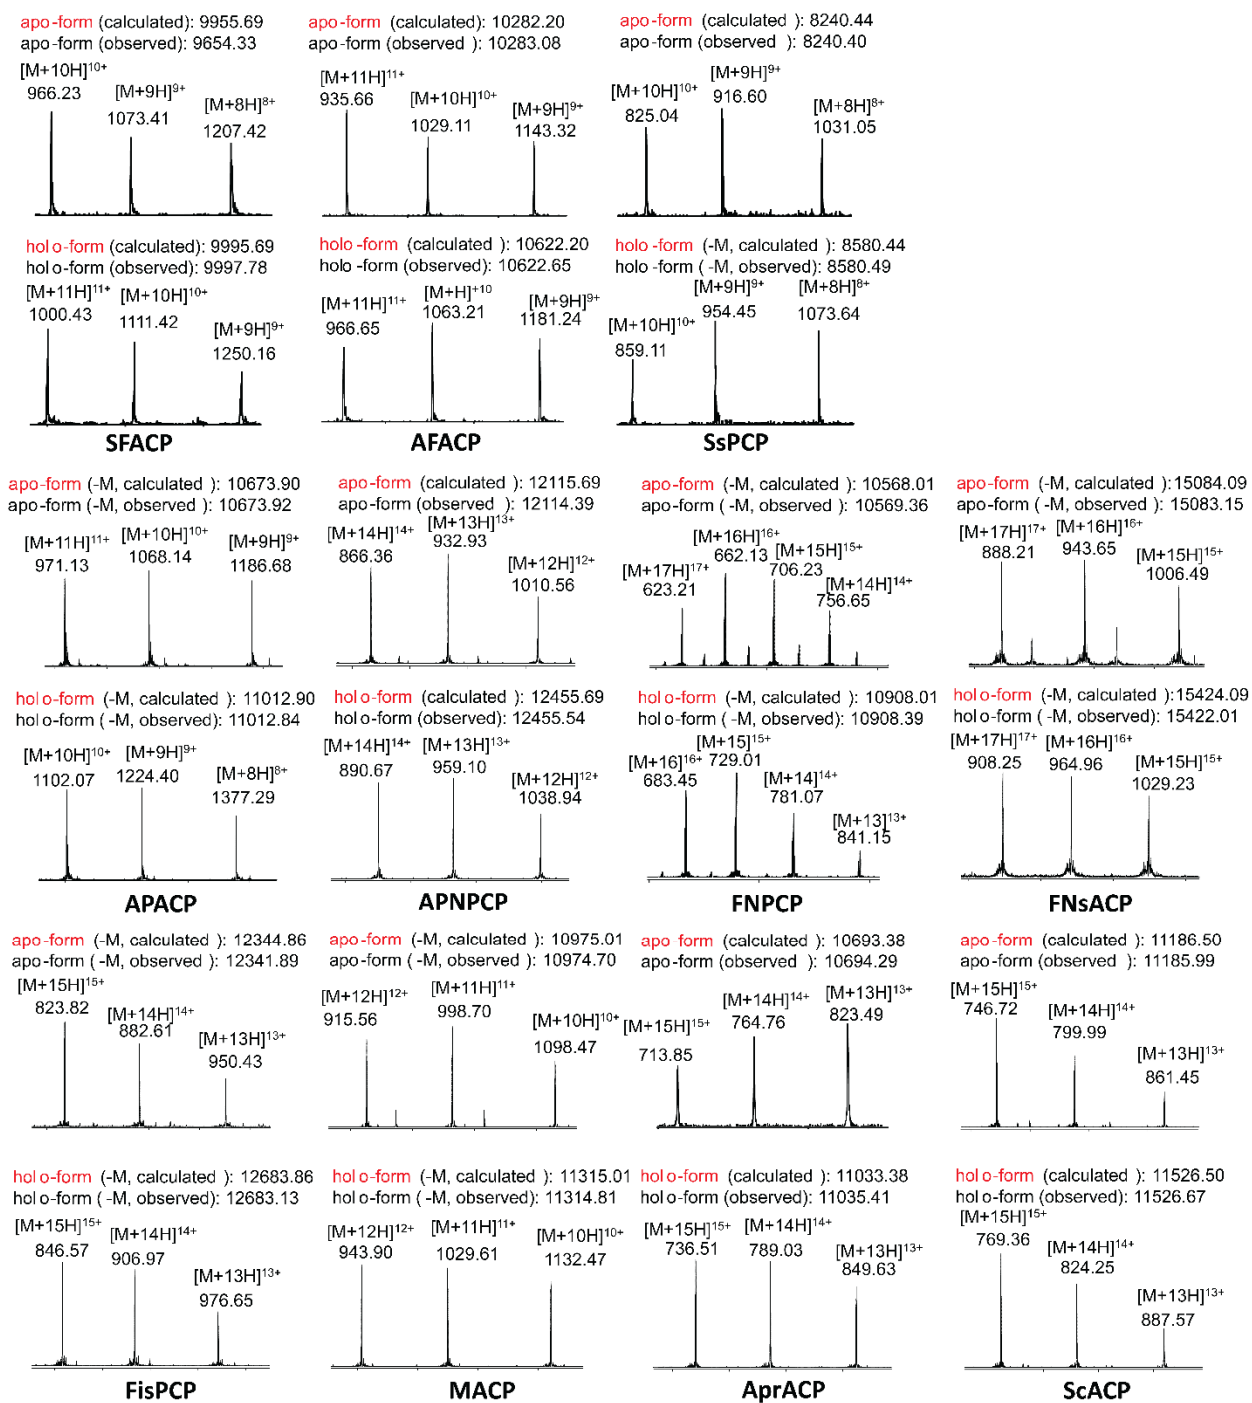

**Fig. S5.** HR-MS spectra of apo- and holo-CPs. The charge status,  $m/z$  value, and calculated and observed molecular weights of CPs were shown.

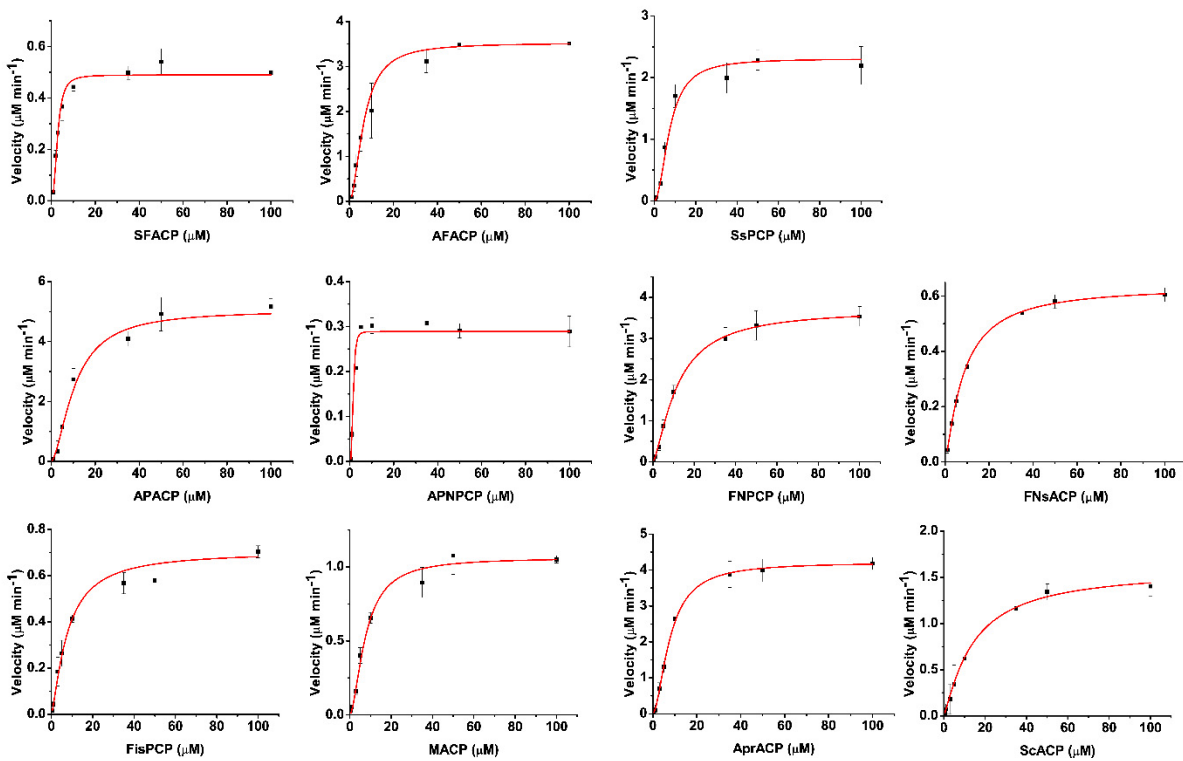

**Fig. S6.** Michaelis-Menten kinetic analysis of APPT evaluated for 11 selected CP substrates.

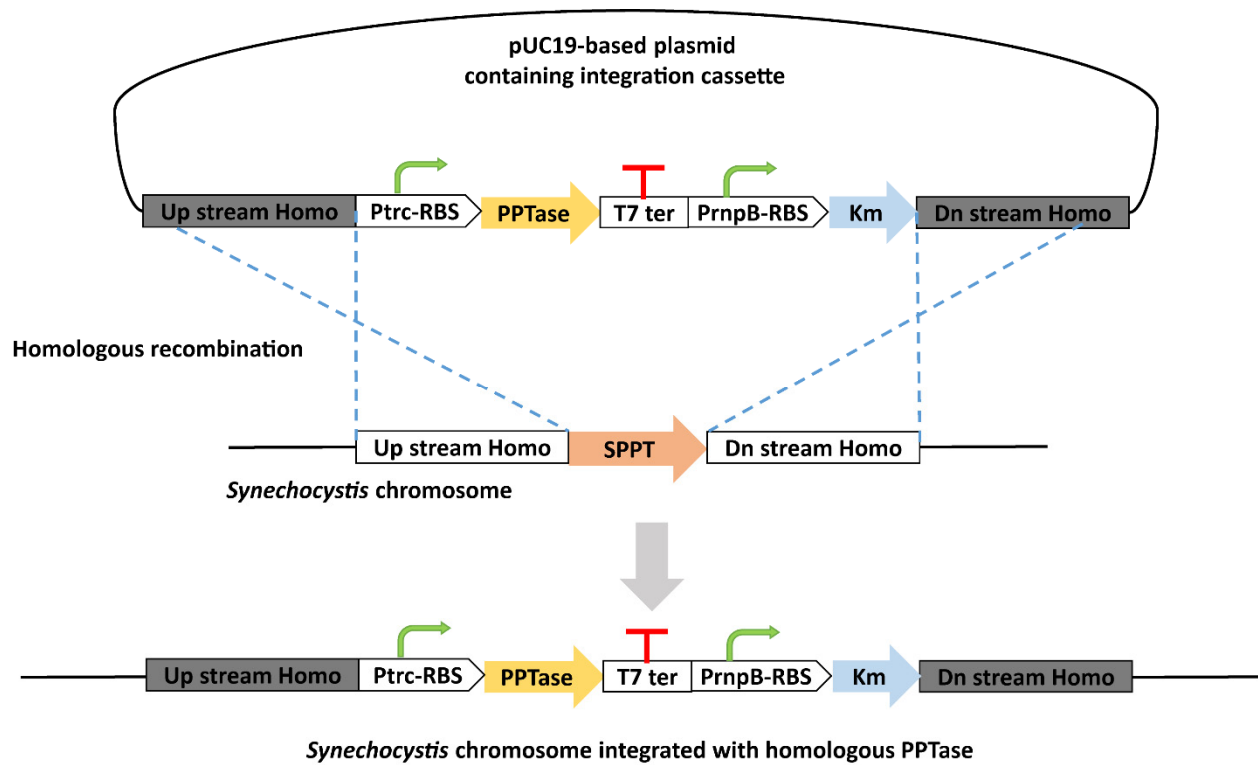

**Fig. S7.** Schematic representation of homologous replacement of the *SPPT* gene with foreign *PPTase* genes in *Synechocystis*.



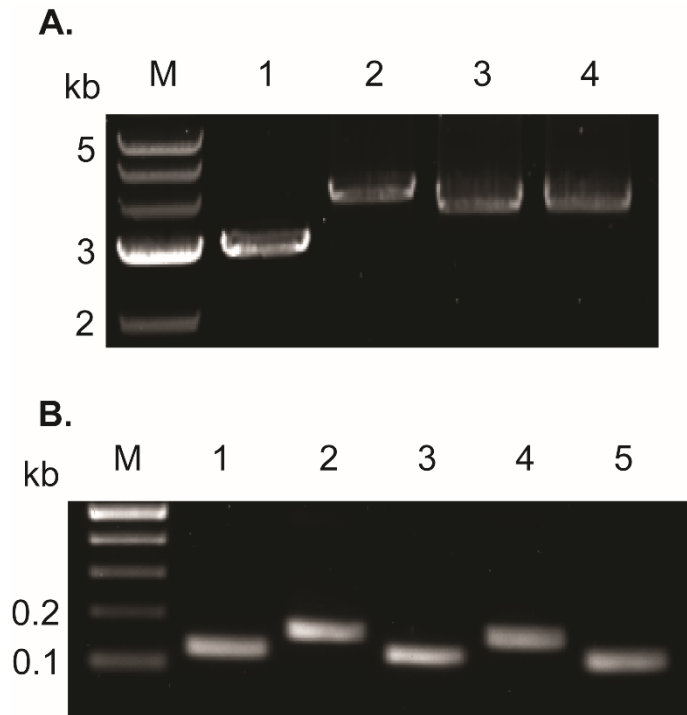

**Fig. S8.** PCR analyses of the integration and transcription of the *APPT*, *MPPT* and *Sfp* genes in *Synechocystis* mutants. **(A)** PCR diagnosis of *Synechocystis* mutants whose *SPPT* gene was chromosomally replaced by the *APPT*, *MPPT* and *Sfp* genes. The *SPPT* gene was detected in the wild type (lane 1) but not in three mutants (lanes 2 to 4). The *APPT*, *MPPT* and *Sfp* genes were found in one of three mutants, respectively (lanes 2 to 4). **(B)** RT-PCR analysis of the transcription of *SPPT*, *APPT*, *MPPT* and *Sfp* genes in *Synechocystis* wild type and mutants (lanes 2 to 5, respectively). The *rnpB* gene was used as a positive control (lane 1).
